# Supplementary material for: Fighting Amyotrophic Lateral Sclerosis: In-Silico Molecular Docking Study of SFPQ Protein to Identify a Potential Therapeutic Compound
Source: Research Square preprint supplement (doi:10.21203/rs.3.rs-940419/v1), 2021-10-05
Supplement: Supplementary file 1 [file ccdeb9104208bf3eeda77b5f.xlsx]

## Sheet: 6ncq docking results
Name	Atoms	Weight	Molecule project	Lipinski violations	Hydrogen donors	Hydrogen acceptors	LogP	Flexible bonds	Score	Hydrogen bond score	Metal interaction score	Steric interaction score	Ligand conformation penalty
574 1	80	499.657	6ncq	2	11	12	-4.161	18	-56.792	-7.97065	0	-55.2325	6.41112
486 1	72	486.582	6ncq	2	17	16	-2.058	22	-56.5989	-18.2046	0	-48.9504	10.5561
493 1	80	499.657	6ncq	2	11	12	-4.161	18	-56.4472	-11.6214	0	-49.7803	4.95447
573 1	75	487.606	6ncq	2	14	14	-3.365	22	-53.7371	-15.0004	0	-47.4669	8.73028
47 1	72	486.574	6ncq	2	12	14	-4.099	16	-53.5718	-14.2297	0	-44.8835	5.54147
581 1	70	458.568	6ncq	2	15	14	-2.384	21	-53.0169	-23.5651	0	-35.9481	6.49635
16 1	75	474.603	6ncq	2	11	12	-2.783	20	-52.8024	-15.9742	0	-43.7902	6.96199
602 1	70	488.538	6ncq	2	8	13	-2.498	16	-52.5958	-17.3544	0	-42.2256	6.98419
569 1	76	473.619	6ncq	2	12	12	-3.877	20	-52.3083	-11.3905	0	-45.4245	4.50672
580 1	70	458.568	6ncq	2	15	14	-2.972	20	-51.7853	-15.9836	0	-43.162	7.36031
566 1	61	403.48	6ncq	2	10	11	-3.313	18	-51.7144	-14	0	-44.5865	6.87205
623 1	68	460.536	6ncq	2	13	14	-3.159	20	-51.6405	-15.2994	0	-43.0098	6.66877
628 1	72	490.562	6ncq	2	14	15	-4.396	20	-51.3719	-11.6915	0	-48.1306	8.45019
84 1	68	430.554	6ncq	2	13	12	-2.71	20	-51.2664	-19.5917	0	-40.6799	9.00525
62 1	66	402.54	6ncq	1	11	10	-3.036	19	-51.2141	-10	0	-46.4136	5.19948
147 1	63	427.502	6ncq	2	7	11	-2.969	12	-50.5942	-9.62461	0	-48.8478	7.87825
53 1	68	430.554	6ncq	2	13	12	-2.71	20	-49.9782	-14.7024	0	-46.2107	10.935
662 1	72	490.558	6ncq	2	11	14	-3.626	18	-49.6448	-16.8743	0	-43.0492	10.2786
550- 1	70	458.568	6ncq	2	15	14	-2.384	21	-48.9971	-14.8302	0	-41.4896	7.32266
442 1	68	430.554	6ncq	2	13	12	-3.298	19	-47.4092	-14.7566	0	-38.7842	6.13169
126 1	62	475.455	6ncq	2	9	15	-4.805	15	-47.31	-11.8126	0	-42.8072	7.30978
544 1	67	414.547	6ncq	1	6	9	-0.196	13	-47.0493	-6.79584	0	-48.3656	8.11206
604 1	61	416.475	6ncq	2	7	11	-1.211	15	-46.9163	-11.8961	0	-41.7345	6.71428
564 1	63	418.495	6ncq	2	11	12	-4.506	18	-46.7811	-12	0	-41.3484	6.56723
129 1	59	461.428	6ncq	2	9	15	-4.574	15	-46.4885	-19.9645	0	-35.8997	9.37568
551 1	47	332.357	6ncq	1	7	10	-3.74	10	-38.8769	-14.7688	0	-28.2165	4.10834
